# Supplementary material for: P2X7 Receptor Activity Limits Accumulation of T Cells within Tumors
Source: Oxford University Press journal article supplement (doi:10.1158/0008-5472.can-19-3807), 2020-07-22
Supplement: 00085472can193807-sup-233448_3_supp_6362873_qc0xw8.xlsx [file 00085472can193807-sup-233448_3_supp_6362873_qc0xw8.xlsx]

## Sheet: Sheet1
Extended Data Table 1: differentially expressed genes in the comparison P2rx7-/- vs WT (q-value %<5 and absolute fold change>1.5)
ProbeID	Symbol_mm	Symbol_hs	Description	EntrezID	Score(d)	Numerator(r)	Denominator(s+s0)	Fold Change	logFG	q-value(%)	p-value
100039864_at	Snhg12	---	small nucleolar RNA host gene 12	100039864	-4.85488	-0.82417	0.169761	-1.77052	-0.82417	1.56844	0.00263293
100040608_at	Fancf	FANCF	Fanconi anemia, complementation group F	100040608	3.26859	0.60662	0.185591	1.52269	0.60662	3.98916	0.0111838
100043468_at	Zfp955b	ZNF669	zinc finger protein 955B	100043468	6.5633	0.744387	0.113417	1.67526	0.744387	0.31956	0.000800918
100124698_at	Trbv29	TRBV28	T cell receptor beta, variable 29	100124698	-3.41707	-0.693147	0.202849	-1.61681	-0.693147	3.61437	0.00977508
100127111_at	Snord22	SNORD22	small nucleolar RNA, C/D box 22	100127111	-7.13531	-0.790411	0.110775	-1.72957	-0.790411	0	0.000501024
100206_at	Adprhl2	ADPRHL2	ADP-ribosylhydrolase like 2	100206	7.09293	0.659597	0.0929936	1.57964	0.659597	0.31956	0.000529243
100503043_at	Armcx4	ARMCX4	armadillo repeat containing, X-linked 4	100503043	-3.9922	-0.820081	0.205421	-1.7655	-0.820081	2.63314	0.005685
100503120_at	A930006K02Rik	---	RIKEN cDNA A930006K02 gene	100503120	-3.58745	-0.629448	0.175458	-1.54697	-0.629448	3.1074	0.00824241
100503392_at	4833438C02Rik	---	RIKEN cDNA 4833438C02 gene	100503392	-4.95535	-0.647189	0.130604	-1.56611	-0.647189	1.56844	0.00244757
100504486_at	Gdap10	---	ganglioside-induced differentiation-associated-protein 10	100504486	-4.69762	-1.31657	0.280263	-2.49073	-1.31657	1.56844	0.00305179
100675_at	AI480526	---	expressed sequence AI480526	100675	3.05134	0.76611	0.251073	1.70068	0.76611	4.56391	0.013926
101489_at	Ric8a	RIC8A	RIC8 guanine nucleotide exchange factor A	101489	3.65344	0.631988	0.172984	1.5497	0.631988	3.1074	0.00767305
101602_at	AI467606	C16orf54	expressed sequence AI467606	101602	9.84328	1.08392	0.110118	2.11979	1.08392	0	0.000142478
101685_at	Spty2d1	SPTY2D1	SPT2, Suppressor of Ty, domain containing 1 (S. cerevisiae)	101685	-5.71713	-0.906494	0.158558	-1.87449	-0.906494	0.449306	0.00127234
102634034_at	Gm31718	---	predicted gene, 31718	102634034	-3.62514	-0.588573	0.162359	-1.50376	-0.588573	3.1074	0.00792093
102634072_at	Gm38457	---	predicted gene, 38457	102634072	3.7122	0.890093	0.239775	1.8533	0.890093	3.1074	0.00728628
104215_at	Rhoq	RHOJ	ras homolog family member Q	104215	-5.03644	-1.03823	0.206143	-2.0537	-1.03823	1.02325	0.0022683
105446_at	Gmpr2	GMPR	guanosine monophosphate reductase 2	105446	6.66125	0.604284	0.0907162	1.52022	0.604284	0.31956	0.00076606
107576_at	Tcrg-C4	TRGC1	T cell receptor gamma, constant 4	107576	-3.97352	-0.822638	0.20703	-1.76864	-0.822638	2.63314	0.00582001
107684_at	Coro2a	CORO2A	coronin, actin binding protein 2A	107684	-4.34139	-0.621482	0.143153	-1.53845	-0.621482	2.10479	0.00420987
107932_at	Chd4	CHD3	chromodomain helicase DNA binding protein 4	107932	-4.89172	-1.06393	0.217496	-2.09061	-1.06393	1.56844	0.00256377
108097_at	Prkab2	PRKAB1	protein kinase, AMP-activated, beta 2 non-catalytic subunit	108097	-3.34108	-0.679097	0.203257	-1.60114	-0.679097	3.61437	0.0105342
108098_at	Med21	MED21	mediator complex subunit 21	108098	4.68429	0.707286	0.150991	1.63273	0.707286	1.50552	0.00309937
108167355_at	LOC108167355	---	uncharacterized LOC108167355	108167355	-3.25122	-1.19141	0.366449	-2.28375	-1.19141	3.98916	0.0113819
108167746_at	Gm46172	---	predicted gene, 46172	108167746	5.05131	0.587818	0.116369	1.50297	0.587818	1.50552	0.00222625
108755_at	Lyrm2	LYRM2	LYR motif containing 2	108755	5.37474	0.768727	0.143026	1.70377	0.768727	1.02325	0.00163144
108900_at	Fam72a	FAM72A	family with sequence similarity 72, member A	108900	-5.17293	-0.59212	0.114465	-1.50746	-0.59212	1.02325	0.00200326
108960_at	Irak2	IRAK2	interleukin-1 receptor-associated kinase 2	108960	-4.16125	-1.04488	0.251097	-2.06319	-1.04488	2.10479	0.00492641
109019_at	Nabp1	NABP1	nucleic acid binding protein 1	109019	-3.74327	-1.02427	0.273629	-2.03393	-1.02427	3.1074	0.00702512
109075_at	Exosc4	EXOSC4	exosome component 4	109075	6.2195	0.77722	0.124965	1.71382	0.77722	0.31956	0.000955846
110611_at	Hdlbp	HDLBP	high density lipoprotein (HDL) binding protein	110611	-3.6996	-0.702453	0.189873	-1.62727	-0.702453	3.1074	0.00734106
11305_at	Abca2	ABCA1	ATP-binding cassette, sub-family A (ABC1), member 2	11305	-3.12708	-0.690413	0.220785	-1.61374	-0.690413	3.98916	0.0129605
11555_at	Adrb2	ADRB2	adrenergic receptor, beta 2	11555	-3.05661	-0.599276	0.196059	-1.51496	-0.599276	3.98916	0.0138369
11605_at	Gla	GLA	galactosidase, alpha	11605	-3.69462	-1.3015	0.352269	-2.46485	-1.3015	3.1074	0.00737703
116748_at	Lsm10	LSM10	U7 snRNP-specific Sm-like protein LSM10	116748	6.58274	0.730951	0.11104	1.65973	0.730951	0.31956	0.000790959
117171_at	1110038F14Rik	C8orf33	RIKEN cDNA 1110038F14 gene	117171	3.46609	0.672207	0.193938	1.59351	0.672207	3.61437	0.00940547
11770_at	Fabp4	FABP3	fatty acid binding protein 4, adipocyte	11770	4.11207	0.826678	0.201037	1.7736	0.826678	2.63314	0.00508576
11816_at	Apoe	APOE	apolipoprotein E	11816	3.05759	1.05935	0.346467	2.084	1.05935	4.56391	0.0138154
11839_at	Areg	AREG	amphiregulin	11839	-8.0715	-2.00729	0.248689	-4.02027	-2.00729	0	0.000315111
11843_at	Arf4	ARF4	ADP-ribosylation factor 4	11843	-4.66285	-0.737248	0.158111	-1.66699	-0.737248	1.56844	0.00315581
11881_at	Arsb	ARSB	arylsulfatase B	11881	-9.01148	-0.858225	0.0952369	-1.81281	-0.858225	0	0.000199469
12043_at	Bcl2	BCL2	B cell leukemia/lymphoma 2	12043	-12.9604	-0.800206	0.0617422	-1.74135	-0.800206	0	7.77403e-05
12192_at	Zfp36l1	ZFP36L1	zinc finger protein 36, C3H type-like 1	12192	-5.69057	-0.738832	0.129834	-1.66882	-0.738832	0.449306	0.00129724
12323_at	Camk2b	CAMK1	calcium/calmodulin-dependent protein kinase II, beta	12323	3.76229	0.658465	0.175017	1.5784	0.658465	3.1074	0.00690505
12455_at	Ccnt1	CCNT1	cyclin T1	12455	-4.42156	-1.05414	0.23841	-2.07648	-1.05414	1.56844	0.00390721
12475_at	Cd14	CD14	CD14 antigen	12475	3.21974	0.855249	0.265627	1.80907	0.855249	3.98916	0.0117161
12476_at	Cd151	CD151	CD151 antigen	12476	5.89361	0.697839	0.118406	1.62207	0.697839	0.521901	0.00115006
12515_at	Cd69	CD69	CD69 antigen	12515	-10.0486	-0.726055	0.0722547	-1.65411	-0.726055	0	0.000137498
12575_at	Cdkn1a	CDKN1A	cyclin-dependent kinase inhibitor 1A (P21)	12575	-5.31437	-1.47946	0.278388	-2.78844	-1.47946	1.02325	0.00174763
12577_at	Cdkn1c	CDKN1C	cyclin-dependent kinase inhibitor 1C (P57)	12577	-3.36869	-1.10357	0.327597	-2.14886	-1.10357	3.61437	0.0102399
12632_at	Cfl2	CFL1	cofilin 2, muscle	12632	4.80889	0.666475	0.138592	1.58719	0.666475	1.50552	0.00274083
12660_at	Chka	CHKA	choline kinase alpha	12660	-4.30533	-0.630725	0.146498	-1.54834	-0.630725	2.10479	0.00433381
12700_at	Cish	CISH	cytokine inducible SH2-containing protein	12700	-6.96293	-0.948096	0.136163	-1.92932	-0.948096	0	0.000624412
12703_at	Socs1	SOCS1	suppressor of cytokine signaling 1	12703	-4.34519	-0.879144	0.202326	-1.83928	-0.879144	2.10479	0.00418387
12766_at	Cxcr3	CXCR3	chemokine (C-X-C motif) receptor 3	12766	5.32972	0.779697	0.146292	1.71677	0.779697	1.02325	0.00171665
12774_at	Ccr5	CCR2	chemokine (C-C motif) receptor 5	12774	-3.06522	-0.870897	0.284122	-1.8288	-0.870897	3.98916	0.0137423
12795_at	Plk3	PLK3	polo like kinase 3	12795	-3.75501	-0.671346	0.178787	-1.59256	-0.671346	3.1074	0.00695817
12802_at	Cnr2	CNR2	cannabinoid receptor 2 (macrophage)	12802	-6.92893	-1.096	0.158177	-2.13761	-1.096	0	0.000659271
12807_at	Hps3	HPS3	HPS3, biogenesis of lysosomal organelles complex 2 subunit 1	12807	5.26661	0.607024	0.115259	1.52311	0.607024	1.02325	0.00182842
12912_at	Creb1	ATF1	cAMP responsive element binding protein 1	12912	-12.1817	-0.703582	0.0577571	-1.62854	-0.703582	0	8.76999e-05
13036_at	Ctsh	CTSH	cathepsin H	13036	4.19266	0.729989	0.174111	1.65863	0.729989	2.63314	0.00477038
13041_at	Ctsw	CTSW	cathepsin W	13041	-3.80281	-0.677926	0.17827	-1.59984	-0.677926	2.63314	0.00669756
13121_at	Cyp51	CYP26A1	cytochrome P450, family 51	13121	-4.8118	-0.876101	0.182073	-1.83541	-0.876101	1.56844	0.0027198
13197_at	Gadd45a	GADD45A	growth arrest and DNA-damage-inducible 45 alpha	13197	-11.476	-0.968454	0.0843896	-1.95674	-0.968454	0	0.000102639
13494_at	Drg1	DRG1	developmentally regulated GTP binding protein 1	13494	6.48895	0.601268	0.0926603	1.51705	0.601268	0.31956	0.000840757
13521_at	Slc26a2	SLC26A2	solute carrier family 26 (sulfate transporter), member 2	13521	-4.99293	-0.746697	0.149551	-1.67795	-0.746697	1.02325	0.00235738
13537_at	Dusp2	DUSP18	dual specificity phosphatase 2	13537	-5.69138	-0.657321	0.115494	-1.57715	-0.657321	0.449306	0.00129226
13813_at	Eomes	EOMES	eomesodermin	13813	-6.11366	-0.772772	0.126401	-1.70855	-0.772772	0.449306	0.00100564
140795_at	P2ry14	P2RY14	purinergic receptor P2Y, G-protein coupled, 14	140795	4.72929	0.682721	0.14436	1.60516	0.682721	1.50552	0.00296879
140859_at	Nek8	NEK8	NIMA (never in mitosis gene a)-related expressed kinase 8	140859	-3.06066	-0.676462	0.221019	-1.59822	-0.676462	3.98916	0.0137816
14102_at	Fas	FAS	Fas (TNF receptor superfamily member 6)	14102	-4.51278	-0.648708	0.143749	-1.56776	-0.648708	1.56844	0.0035874
14103_at	Fasl	FASLG	Fas ligand (TNF superfamily, member 6)	14103	-4.02591	-0.662243	0.164495	-1.58254	-0.662243	2.63314	0.00550905
14131_at	Fcgr3	FCGR2A	Fc receptor, IgG, low affinity III	14131	3.02018	0.778901	0.257899	1.71582	0.778901	4.56391	0.014331
14284_at	Fosl2	FOSL2	fos-like antigen 2	14284	-5.6527	-0.926367	0.16388	-1.90048	-0.926367	0.521901	0.00133542
14367_at	Fzd5	FZD5	frizzled class receptor 5	14367	-4.45689	-0.821296	0.184276	-1.76699	-0.821296	1.56844	0.00378769
14455_at	Gas5	GAS5	growth arrest specific 5	14455	-4.17058	-0.657783	0.15772	-1.57766	-0.657783	2.10479	0.00488436
14462_at	Gata3	GATA3	GATA binding protein 3	14462	-4.16696	-0.644929	0.154772	-1.56366	-0.644929	2.10479	0.00489432
14538_at	Gcnt2	GCNT2	glucosaminyl (N-acetyl) transferase 2, I-branching enzyme	14538	-5.74142	-1.39156	0.242372	-2.62362	-1.39156	0.449306	0.00124523
14579_at	Gem	GEM	GTP binding protein (gene overexpressed in skeletal muscle)	14579	-3.38234	-1.25573	0.37126	-2.38787	-1.25573	3.61437	0.0100954
14660_at	Gls	GLS	glutaminase	14660	-4.16466	-0.594664	0.142788	-1.51012	-0.594664	2.10479	0.00491534
14733_at	Gpc1	GPC1	glypican 1	14733	-3.4675	-0.927294	0.267425	-1.90171	-0.927294	3.61437	0.0093944
14744_at	Gpr65	GPR65	G-protein coupled receptor 65	14744	-6.7666	-1.10648	0.163521	-2.1532	-1.10648	0	0.000709069
14825_at	Cxcl1	CXCL1	chemokine (C-X-C motif) ligand 1	14825	2.8845	1.01602	0.352233	2.02233	1.01602	4.56391	0.0166212
14911_at	Thumpd3	THUMPD3	THUMP domain containing 3	14911	3.22001	0.59981	0.186276	1.51552	0.59981	3.98916	0.0117111
14939_at	Gzmb	CTSG	granzyme B	14939	-2.95735	-0.808913	0.273526	-1.75189	-0.808913	4.56391	0.0153757
15013_at	H2-Q2	HLA-A	histocompatibility 2, Q region locus 2	15013	7.21534	1.66333	0.230528	3.16748	1.66333	0.31956	0.000481104
15357_at	Hmgcr	HMGCR	3-hydroxy-3-methylglutaryl-Coenzyme A reductase	15357	-4.86605	-0.733153	0.150667	-1.66227	-0.733153	1.56844	0.00261301
15370_at	Nr4a1	NR4A1	nuclear receptor subfamily 4, group A, member 1	15370	-6.00856	-0.924072	0.153793	-1.89746	-0.924072	0.449306	0.00106319
15512_at	Hspa2	HSPA1A	heat shock protein 2	15512	-6.92906	-1.32063	0.190593	-2.49775	-1.32063	0	0.000654291
15894_at	Icam1	ICAM1	intercellular adhesion molecule 1	15894	-3.44367	-0.960891	0.279032	-1.94651	-0.960891	3.61437	0.00961241
15939_at	Ier5	IER5	immediate early response 5	15939	-5.35426	-0.87511	0.163442	-1.83415	-0.87511	0.521901	0.0016663
15945_at	Cxcl10	CXCL10	chemokine (C-X-C motif) ligand 10	15945	-3.4048	-0.97595	0.286639	-1.96694	-0.97595	3.61437	0.00984922
15978_at	Ifng	IFNG	interferon gamma	15978	-8.82777	-1.74232	0.197368	-3.34573	-1.74232	0	0.000219388
16010_at	Igfbp4	IGFBP4	insulin-like growth factor binding protein 4	16010	-8.37223	-0.612669	0.0731787	-1.52909	-0.612669	0	0.000280252
16153_at	Il10	AP000295.1	interleukin 10	16153	-3.15397	-0.738475	0.234141	-1.66841	-0.738475	3.98916	0.012525
16175_at	Il1a	IL1A	interleukin 1 alpha	16175	3.12366	1.34854	0.431718	2.54654	1.34854	3.98916	0.0130424
16184_at	Il2ra	IL2RA	interleukin 2 receptor, alpha chain	16184	-6.52384	-0.739883	0.113412	-1.67004	-0.739883	0.449306	0.000820838
16189_at	Il4	CSF2RB	interleukin 4	16189	-7.82885	-1.97577	0.25237	-3.93338	-1.97577	0	0.00034001
16190_at	Il4ra	CSF2RB	interleukin 4 receptor, alpha	16190	-4.25093	-1.04025	0.244712	-2.05659	-1.04025	2.10479	0.00456897
16364_at	Irf4	IRF4	interferon regulatory factor 4	16364	-7.05528	-0.852364	0.120812	-1.80546	-0.852364	0	0.000550268
16410_at	Itgav	ITGA2B	integrin alpha V	16410	-4.86903	-0.995688	0.204494	-1.99403	-0.995688	1.56844	0.00260803
16416_at	Itgb3	AC068234.1	integrin beta 3	16416	-2.84759	-0.843763	0.296308	-1.79473	-0.843763	4.56391	0.0172758
16477_at	Junb	JUNB	jun B proto-oncogene	16477	-4.3957	-0.9214	0.209614	-1.89395	-0.9214	1.56844	0.00401068
16534_at	Kcnn4	KCNN4	potassium intermediate/small conductance calcium-activated channel, subfamily N, member 4	16534	4.5355	0.598772	0.132019	1.51443	0.598772	1.50552	0.00347895
16573_at	Kif5b	KIF5A	kinesin family member 5B	16573	-4.89671	-0.687065	0.140312	-1.61	-0.687065	1.56844	0.00254385
16600_at	Klf4	KLF4	Kruppel-like factor 4 (gut)	16600	-4.63231	-1.5678	0.338449	-2.96453	-1.5678	1.56844	0.00319897
16601_at	Klf9	KLF9	Kruppel-like factor 9	16601	-8.45844	-0.705242	0.0833773	-1.63042	-0.705242	0	0.000275273
16619_at	Klk1b27	KLK1	kallikrein 1-related peptidase b27	16619	4.18179	0.919961	0.219992	1.89206	0.919961	2.63314	0.0048163
16641_at	Klrc1	AC068775.1	killer cell lectin-like receptor subfamily C, member 1	16641	-5.31181	-2.31438	0.435704	-4.97391	-2.31438	1.02325	0.00175261
16643_at	Klrd1	KLRD1	killer cell lectin-like receptor, subfamily D, member 1	16643	-3.8269	-0.709123	0.1853	-1.63481	-0.709123	2.63314	0.00652769
16835_at	Ldlr	LDLR	low density lipoprotein receptor	16835	-6.71388	-0.893747	0.133119	-1.858	-0.893747	0	0.000728435
16854_at	Lgals3	LGALS3	lectin, galactose binding, soluble 3	16854	3.40922	0.758431	0.222465	1.69165	0.758431	3.61437	0.00983926
16963_at	Xcl1	XCL1	chemokine (C motif) ligand 1	16963	-9.82661	-2.6759	0.272312	-6.39039	-2.6759	0	0.000147458
170439_at	Elovl6	ELOVL6	ELOVL family member 6, elongation of long chain fatty acids (yeast)	170439	-4.49702	-0.82679	0.183853	-1.77373	-0.82679	1.56844	0.00364051
170625_at	Snx18	SNX18	sorting nexin 18	170625	-3.37239	-0.741172	0.219777	-1.67153	-0.741172	3.61437	0.0101884
170741_at	Pilrb1	PILRA	paired immunoglobin-like type 2 receptor beta 1	170741	3.12968	0.847137	0.270678	1.79893	0.847137	3.98916	0.0129146
170748_at	Smco4	SMCO4	single-pass membrane protein with coiled-coil domains 4	170748	7.68965	0.604574	0.0786218	1.52053	0.604574	0	0.000359929
170942_at	Erdr1	---	erythroid differentiation regulator 1	170942	-3.93732	-4.58314	1.16403	-23.9697	-4.58314	2.63314	0.00598213
17101_at	Lyst	LYST	lysosomal trafficking regulator	17101	-7.19689	-0.945192	0.131333	-1.92544	-0.945192	0	0.000486084
17119_at	Mxd1	MXD1	MAX dimerization protein 1	17119	-4.63727	-0.991438	0.213798	-1.98817	-0.991438	1.56844	0.00318901
17133_at	Maff	MAFF	v-maf musculoaponeurotic fibrosarcoma oncogene family, protein F (avian)	17133	-9.61048	-2.20709	0.229654	-4.61743	-2.20709	0	0.000163504
17258_at	Mef2a	MEF2A	myocyte enhancer factor 2A	17258	-3.60175	-0.589608	0.1637	-1.50484	-0.589608	3.1074	0.00812842
17279_at	Melk	MELK	maternal embryonic leucine zipper kinase	17279	5.03027	0.700214	0.1392	1.62475	0.700214	1.50552	0.00228435
17355_at	Aff1	AFF1	AF4/FMR2 family, member 1	17355	-3.10559	-0.587283	0.189105	-1.50242	-0.587283	3.98916	0.0132399
17357_at	Marcksl1	MARCKSL1	MARCKS-like 1	17357	-3.79206	-0.755212	0.199156	-1.68788	-0.755212	2.63314	0.00676396
17395_at	Mmp9	MMP9	matrix metallopeptidase 9	17395	-7.6747	-0.779526	0.101571	-1.71657	-0.779526	0	0.000369889
17476_at	Mpeg1	MPEG1	macrophage expressed gene 1	17476	3.00132	0.773612	0.257757	1.70954	0.773612	4.56391	0.0146232
17533_at	Mrc1	MRC1	mannose receptor, C type 1	17533	2.8394	0.933309	0.328699	1.90965	0.933309	4.56391	0.0174678
17691_at	Sik1	SIK1	salt inducible kinase 1	17691	-4.89406	-1.11477	0.227779	-2.1656	-1.11477	1.56844	0.00254883
17828_at	Bloc1s5	BLOC1S5	biogenesis of lysosomal organelles complex-1, subunit 5, muted	17828	2.89628	0.627329	0.216598	1.5447	0.627329	4.56391	0.0164375
17829_at	Muc1	MUC1	mucin 1, transmembrane	17829	-3.22536	-0.63933	0.198219	-1.55761	-0.63933	3.98916	0.0116851
17869_at	Myc	AL139260.3	myelocytomatosis oncogene	17869	-6.4025	-0.703222	0.109836	-1.62814	-0.703222	0.449306	0.000875616
17872_at	Ppp1r15a	PPP1R15A	protein phosphatase 1, regulatory (inhibitor) subunit 15A	17872	-6.11154	-1.002	0.163952	-2.00278	-1.002	0.449306	0.00101062
17873_at	Gadd45b	GADD45B	growth arrest and DNA-damage-inducible 45 beta	17873	-6.46168	-0.996306	0.154187	-1.99489	-0.996306	0.449306	0.000855696
17999_at	Nedd4	NEDD4	neural precursor cell expressed, developmentally down-regulated 4	17999	-6.17586	-0.780041	0.126305	-1.71718	-0.780041	0.449306	0.000980745
18030_at	Nfil3	NFIL3	nuclear factor, interleukin 3, regulated	18030	-5.41522	-0.747827	0.138097	-1.67926	-0.747827	0.521901	0.0015833
18037_at	Nfkbie	ANKFY1	nuclear factor of kappa light polypeptide gene enhancer in B cells inhibitor, epsilon	18037	-6.09899	-0.793798	0.130152	-1.73363	-0.793798	0.449306	0.00102058
18100_at	Mrpl40	MRPL40	mitochondrial ribosomal protein L40	18100	3.24378	0.65356	0.201481	1.57305	0.65356	3.98916	0.0114682
18124_at	Nr4a3	NR4A2	nuclear receptor subfamily 4, group A, member 3	18124	-5.21489	-1.01736	0.195087	-2.02421	-1.01736	1.02325	0.00191805
18186_at	Nrp1	NRP1	neuropilin 1	18186	-5.22591	-0.708905	0.135652	-1.63456	-0.708905	1.02325	0.00189703
18227_at	Nr4a2	NR4A2	nuclear receptor subfamily 4, group A, member 2	18227	-5.59196	-1.14437	0.204645	-2.21049	-1.14437	0.521901	0.00139241
18439_at	P2rx7	P2RX7	purinergic receptor P2X, ligand-gated ion channel, 7	18439	-7.04279	-1.14532	0.162623	-2.21195	-1.14532	0	0.000570188
18600_at	Padi2	PADI1	peptidyl arginine deiminase, type II	18600	-4.72522	-0.628225	0.132952	-1.54566	-0.628225	1.56844	0.00298373
18626_at	Per1	PER1	period circadian clock 1	18626	-6.59822	-0.999687	0.151509	-1.99957	-0.999687	0.449306	0.000785979
18645_at	Pfn2	PFN1	profilin 2	18645	3.00341	0.65924	0.219498	1.57925	0.65924	4.56391	0.0146
18796_at	Plcb2	PLCB1	phospholipase C, beta 2	18796	-3.15506	-0.68236	0.216275	-1.60476	-0.68236	3.98916	0.0125018
19016_at	Pparg	PPARG	peroxisome proliferator activated receptor gamma	19016	3.83473	0.994362	0.259304	1.9922	0.994362	3.1074	0.00648398
19217_at	Ptger2	PTGER2	prostaglandin E receptor 2 (subtype EP2)	19217	-8.59191	-0.878486	0.102246	-1.83845	-0.878486	0	0.000245394
192231_at	Hexim1	HEXIM1	hexamethylene bis-acetamide inducible 1	192231	-5.7904	-0.729741	0.126026	-1.65834	-0.729741	0.449306	0.00121701
19243_at	Ptp4a1	PTP4A1	protein tyrosine phosphatase 4a1	19243	-3.61218	-0.965848	0.267387	-1.95321	-0.965848	3.1074	0.00800836
19259_at	Ptpn5	PTPN5	protein tyrosine phosphatase, non-receptor type 5	19259	-7.7356	-0.606703	0.07843	-1.52277	-0.606703	0	0.000354949
19302_at	Pex2	PEX2	peroxisomal biogenesis factor 2	19302	4.62672	0.72315	0.156299	1.65078	0.72315	1.50552	0.00322221
19341_at	Rab4a	RAB14	RAB4A, member RAS oncogene family	19341	-5.46465	-0.897478	0.164233	-1.86281	-0.897478	0.521901	0.0015169
19419_at	Rasgrp1	RASGRP1	RAS guanyl releasing protein 1	19419	-2.8797	-0.655198	0.227523	-1.57483	-0.655198	4.56391	0.0166992
195040_at	Tmem199	TMEM199	transmembrane protein 199	195040	5.20491	0.714452	0.137265	1.64086	0.714452	1.50552	0.00194738
19652_at	Rbm3	HNRNPDL	RNA binding motif (RNP1, RRM) protein 3	19652	-7.12347	-1.4139	0.198484	-2.66456	-1.4139	0	0.000510983
19696_at	Rel	REL	reticuloendotheliosis oncogene	19696	-5.18206	-0.926552	0.1788	-1.90073	-0.926552	1.02325	0.00197726
19734_at	Rgs16	RGS16	regulator of G-protein signaling 16	19734	-4.34769	-0.891416	0.205032	-1.855	-0.891416	2.10479	0.00417391
20304_at	Ccl5	CCL5	chemokine (C-C motif) ligand 5	20304	-5.41176	-1.01947	0.188381	-2.02718	-1.01947	0.521901	0.0015916
20363_at	Selenop	SELENOP	selenoprotein P	20363	3.10893	0.620672	0.199642	1.53759	0.620672	3.98916	0.0131757
20371_at	Foxp3	FOXP3	forkhead box P3	20371	-3.87873	-0.857632	0.221111	-1.81206	-0.857632	2.63314	0.00626487
20443_at	St3gal4	ST3GAL4	ST3 beta-galactoside alpha-2,3-sialyltransferase 4	20443	-4.51297	-0.712465	0.15787	-1.6386	-0.712465	1.56844	0.00358242
20527_at	Slc2a3	SLC2A1	solute carrier family 2 (facilitated glucose transporter), member 3	20527	-12.483	-1.18179	0.0946721	-2.26859	-1.18179	0	8.27201e-05
20539_at	Slc7a5	SLC7A5	solute carrier family 7 (cationic amino acid transporter, y+ system), member 5	20539	-3.05139	-0.596374	0.195444	-1.51191	-0.596374	3.98916	0.013921
20556_at	Slfn2	SLFN12	schlafen 2	20556	4.5143	0.744973	0.165025	1.67594	0.744973	2.10479	0.0035625
20620_at	Plk2	PLK2	polo like kinase 2	20620	-4.7298	-1.02789	0.217322	-2.03904	-1.02789	1.56844	0.00296381
20708_at	Serpinb6b	HMSD	serine (or cysteine) peptidase inhibitor, clade B, member 6b	20708	-3.24547	-1.16424	0.358728	-2.24115	-1.16424	3.98916	0.0114472
20715_at	Serpina3g	SERPINA3	serine (or cysteine) peptidase inhibitor, clade A, member 3G	20715	-4.05331	-0.68163	0.168166	-1.60395	-0.68163	2.63314	0.0053851
207785_at	Csrnp2	CSRNP2	cysteine-serine-rich nuclear protein 2	207785	-8.51312	-1.05831	0.124315	-2.08249	-1.05831	0	0.000260333
208266_at	Dot1l	DOT1L	DOT1-like, histone H3 methyltransferase (S. cerevisiae)	208266	-4.17444	-0.851893	0.204074	-1.80487	-0.851893	2.10479	0.00486831
208715_at	Hmgcs1	HMGCS1	3-hydroxy-3-methylglutaryl-Coenzyme A synthase 1	208715	-4.50689	-0.620979	0.137784	-1.53792	-0.620979	1.56844	0.00361451
20893_at	Bhlhe40	BHLHE40	basic helix-loop-helix family, member e40	20893	-5.72812	-0.882825	0.154121	-1.84398	-0.882825	0.449306	0.00125629
209032_at	Zc3hav1l	ZC3HAV1L	zinc finger CCCH-type, antiviral 1-like	209032	-4.19608	-1.36303	0.324833	-2.57224	-1.36303	2.10479	0.00474935
210148_at	Slc30a6	SLC30A6	solute carrier family 30 (zinc transporter), member 6	210148	2.9604	0.648029	0.218899	1.56703	0.648029	4.56391	0.0153182
210529_at	Mettl14	METTL14	methyltransferase like 14	210529	3.15163	0.602573	0.191194	1.51842	0.602573	3.98916	0.0125776
211389_at	Suox	SUOX	sulfite oxidase	211389	3.18753	0.648726	0.20352	1.56778	0.648726	3.98916	0.012026
212276_at	Zfp748	ZNF107	zinc finger protein 748	212276	5.90451	0.837184	0.141787	1.78656	0.837184	0.521901	0.0011401
214854_at	Neurl3	NEURL3	neuralized E3 ubiquitin protein ligase 3	214854	-3.19792	-1.22644	0.383513	-2.3399	-1.22644	3.98916	0.0119081
215418_at	Csrnp1	CSRNP1	cysteine-serine-rich nuclear protein 1	215418	-7.54411	-1.11982	0.148436	-2.1732	-1.11982	0	0.000394788
215900_at	Fam26f	---	family with sequence similarity 26, member F	215900	2.95179	0.903725	0.306162	1.87089	0.903725	4.56391	0.0155035
216274_at	Cep290	CEP290	centrosomal protein 290	216274	8.49708	1.20991	0.142392	2.31324	1.20991	0	0.000265313
21638_at	Tcrg-V4	IGHV1-18	T cell receptor gamma, variable 4	21638	-3.81339	-0.798262	0.209331	-1.739	-0.798262	2.63314	0.00664168
21664_at	Phlda1	PHLDA1	pleckstrin homology like domain, family A, member 1	21664	-7.91644	-0.961677	0.121478	-1.94757	-0.961677	0	0.00033005
216742_at	Fnip1	FNIP1	folliculin interacting protein 1	216742	-4.7303	-0.659328	0.139384	-1.57935	-0.659328	1.56844	0.00295385
216850_at	Kdm6b	KDM6B	KDM1 lysine (K)-specific demethylase 6B	216850	-7.05108	-1.22303	0.173453	-2.33437	-1.22303	0	0.000555248
217038_at	Mrm1	MRM1	mitochondrial rRNA methyltransferase 1	217038	3.70916	0.62682	0.168992	1.54416	0.62682	3.1074	0.0073062
217578_at	Baz1a	BAZ1A	bromodomain adjacent to zinc finger domain 1A	217578	-3.5697	-0.710087	0.19892	-1.6359	-0.710087	3.1074	0.00837963
21803_at	Tgfb1	TGFB1	transforming growth factor, beta 1	21803	-3.82707	-1.12161	0.293073	-2.1759	-1.12161	2.63314	0.00652271
21810_at	Tgfbi	TGFBI	transforming growth factor, beta induced	21810	5.05539	0.968974	0.191671	1.95745	0.968974	1.50552	0.00221629
21815_at	Tgif1	TGIF1	TGFB-induced factor homeobox 1	21815	-4.00715	-0.667644	0.166613	-1.58848	-0.667644	2.63314	0.00559979
21817_at	Tgm2	TGM2	transglutaminase 2, C polypeptide	21817	4.88908	1.06017	0.216845	2.08518	1.06017	1.50552	0.00257373
218311_at	Zfp455	ZNF138	zinc finger protein 455	218311	9.81402	0.591431	0.0602639	1.50674	0.591431	0	0.000152437
21847_at	Klf10	KLF10	Kruppel-like factor 10	21847	-3.48836	-0.611937	0.175422	-1.52831	-0.611937	3.61437	0.00916644
219072_at	Haus4	AL132780.3	HAUS augmin-like complex, subunit 4	219072	4.36672	0.606608	0.138916	1.52268	0.606608	2.10479	0.00409312
21942_at	Tnfrsf9	TNFRSF9	tumor necrosis factor receptor superfamily, member 9	21942	-4.5273	-1.0235	0.226074	-2.03285	-1.0235	1.56844	0.00351657
21943_at	Tnfsf11	TNFSF11	tumor necrosis factor (ligand) superfamily, member 11	21943	-4.6786	-0.93403	0.199639	-1.91061	-0.93403	1.56844	0.00310933
22029_at	Traf1	TRAF1	TNF receptor-associated factor 1	22029	-12.1412	-0.909375	0.0748997	-1.87823	-0.909375	0	9.76595e-05
22032_at	Traf4	TRAF4	TNF receptor associated factor 4	22032	-5.58739	-1.16967	0.209341	-2.2496	-1.16967	0.521901	0.00139739
22057_at	Tob1	TOB1	transducer of ErbB-2.1	22057	-8.36798	-0.686269	0.0820114	-1.60912	-0.686269	0	0.000285232
22134_at	Tgoln1	TGOLN2	trans-golgi network protein	22134	-4.87469	-0.799939	0.1641	-1.74103	-0.799939	1.56844	0.00260305
22145_at	Tuba4a	TUBA1A	tubulin, alpha 4A	22145	-4.04761	-0.601925	0.148711	-1.51774	-0.601925	2.63314	0.00540004
22164_at	Tnfsf4	TNFSF4	tumor necrosis factor (ligand) superfamily, member 4	22164	-4.28144	-0.88862	0.207552	-1.8514	-0.88862	2.10479	0.00440851
22177_at	Tyrobp	TYROBP	TYRO protein tyrosine kinase binding protein	22177	3.35136	0.706827	0.210908	1.63221	0.706827	3.61437	0.0104352
22284_at	Usp9x	USP9X	ubiquitin specific peptidase 9, X chromosome	22284	-6.48168	-0.698324	0.107738	-1.62262	-0.698324	0.449306	0.000845737
223775_at	Pim3	PIM1	proviral integration site 3	223775	-7.49538	-1.2995	0.173374	-2.46144	-1.2995	0	0.000409727
223881_at	Rnd1	RND1	Rho family GTPase 1	223881	-5.23217	-0.631636	0.120722	-1.54932	-0.631636	1.02325	0.00189205
224691_at	Zfp472	---	zinc finger protein 472	224691	5.99894	0.947586	0.157959	1.92864	0.947586	0.31956	0.00107813
224694_at	Zfp81	AC008758.6	zinc finger protein 81	224694	2.95994	0.631967	0.213507	1.54968	0.631967	4.56391	0.0153231
225020_at	Fez2	FEZ2	fasciculation and elongation protein zeta 2 (zygin II)	225020	8.74172	0.610964	0.0698906	1.52728	0.610964	0	0.000235434
225027_at	Srsf7	SRSF7	serine/arginine-rich splicing factor 7	225027	5.42738	0.662198	0.122011	1.58249	0.662198	1.02325	0.00156338
226182_at	Taf5	TAF5	TATA-box binding protein associated factor 5	226182	-13.9757	-0.709676	0.0507792	-1.63544	-0.709676	0	6.28009e-05
22635_at	Zan	ZAN	zonadhesin	22635	7.0482	0.667798	0.0947473	1.58865	0.667798	0.31956	0.000560228
226539_at	Dars2	DARS2	aspartyl-tRNA synthetase 2 (mitochondrial)	226539	-3.79748	-1.38008	0.36342	-2.60282	-1.38008	2.63314	0.00674238
22695_at	Zfp36	ZFP36	zinc finger protein 36	22695	-3.05122	-0.719253	0.235727	-1.64633	-0.719253	3.98916	0.013936
22712_at	Zfp54	ZNF254	zinc finger protein 54	22712	4.28005	0.611517	0.142876	1.52787	0.611517	2.10479	0.00442843
227937_at	Pkp4	CTNND2	plakophilin 4	227937	-3.84128	-0.585563	0.15244	-1.50062	-0.585563	2.63314	0.00645576
228839_at	Tgif2	TGIF1	TGFB-induced factor homeobox 2	228839	-3.57243	-1.43552	0.401832	-2.70479	-1.43552	3.1074	0.00834919
228998_at	Arfgap1	ARFGAP1	ADP-ribosylation factor GTPase activating protein 1	228998	4.47603	0.60891	0.136038	1.52511	0.60891	2.10479	0.00372517
229055_at	Zbtb10	ZBTB10	zinc finger and BTB domain containing 10	229055	-6.70354	-1.28247	0.191312	-2.43255	-1.28247	0	0.000733414
230738_at	Zc3h12a	ZC3H12A	zinc finger CCCH type containing 12A	230738	-4.55065	-0.914685	0.201001	-1.88516	-0.914685	1.56844	0.00343579
230784_at	Sesn2	SESN1	sestrin 2	230784	-4.74115	-0.607805	0.128198	-1.52394	-0.607805	1.56844	0.00292951
231051_at	Kmt2c	KMT2C	lysine (K)-specific methyltransferase 2C	231051	-3.63179	-0.643307	0.177132	-1.56191	-0.643307	3.1074	0.00786007
231207_at	Cpeb2	CPEB2	cytoplasmic polyadenylation element binding protein 2	231207	-7.10744	-0.854465	0.120221	-1.80809	-0.854465	0	0.000519283
231506_at	Lin54	LIN54	lin-54 homolog (C. elegans)	231506	-4.8205	-1.18836	0.246522	-2.27894	-1.18836	1.56844	0.00269546
232164_at	Paip2b	PAIP2B	poly(A) binding protein interacting protein 2B	232164	-2.84358	-0.612939	0.215552	-1.52937	-0.612939	4.56391	0.0173837
232334_at	Vgll4	VGLL4	vestigial like family member 4	232334	-2.87046	-0.760905	0.265081	-1.69455	-0.760905	4.56391	0.0168713
233189_at	Ctu1	CTU1	cytosolic thiouridylase subunit 1	233189	7.99747	0.926828	0.11589	1.90109	0.926828	0	0.000325071
234094_at	Arhgef10	ARHGEF10	Rho guanine nucleotide exchange factor (GEF) 10	234094	-4.72354	-0.671908	0.142247	-1.59318	-0.671908	1.56844	0.00299369
234413_at	Zfp961	ZNF101	zinc finger protein 961	234413	3.78781	0.812096	0.214398	1.75576	0.812096	3.1074	0.00678388
236604_at	Pisd-ps1	---	phosphatidylserine decarboxylase, pseudogene 1	236604	10.7432	0.830626	0.0773165	1.77846	0.830626	0	0.000117579
23827_at	Bpnt1	BPNT1	bisphosphate 3'-nucleotidase 1	23827	-3.56513	-1.05951	0.297187	-2.08422	-1.05951	3.1074	0.00841283
23849_at	Klf6	KLF6	Kruppel-like factor 6	23849	-4.46978	-0.679745	0.152076	-1.60186	-0.679745	1.56844	0.0037462
238693_at	Zfp58	C9orf85	zinc finger protein 58	238693	7.33771	0.6796	0.0926175	1.6017	0.6796	0	0.000466165
23882_at	Gadd45g	GADD45A	growth arrest and DNA-damage-inducible 45 gamma	23882	-5.17744	-0.710585	0.137247	-1.63647	-0.710585	1.02325	0.00198667
239217_at	Kctd12	KCTD12	potassium channel tetramerisation domain containing 12	239217	-3.81495	-1.15991	0.304043	-2.23443	-1.15991	2.63314	0.00662342
239647_at	Pced1b	PCED1A	PC-esterase domain containing 1B	239647	-4.66946	-0.628134	0.13452	-1.54556	-0.628134	1.56844	0.00312759
240064_at	Zfp799	AC008758.6	zinc finger protein 799	240064	7.44755	1.31014	0.175916	2.47966	1.31014	0	0.000446246
240120_at	Zfp119b	ZNF101	zinc finger protein 119b	240120	4.63541	0.725317	0.156473	1.65326	0.725317	1.50552	0.00319399
24063_at	Spry1	SPRY1	sprouty RTK signaling antagonist 1	24063	-4.68286	-1.12556	0.240358	-2.18186	-1.12556	1.56844	0.00310435
24064_at	Spry2	SPRY2	sprouty RTK signaling antagonist 2	24064	-4.74887	-0.953659	0.200818	-1.93678	-0.953659	1.56844	0.00289022
241303_at	Fam78a	FAM78A	family with sequence similarity 78, member A	241303	3.67552	1.20199	0.327025	2.30057	1.20199	3.1074	0.00751812
242341_at	Atp6v0d2	ATP6V0D1	ATPase, H+ transporting, lysosomal V0 subunit D2	242341	-3.22706	-0.586282	0.181677	-1.50137	-0.586282	3.98916	0.0116752
243910_at	Nfkbid	NFKBID	nuclear factor of kappa light polypeptide gene enhancer in B cells inhibitor, delta	243910	-8.21508	-1.11942	0.136264	-2.17259	-1.11942	0	0.000295192
244059_at	Chd2	AC013394.1	chromodomain helicase DNA binding protein 2	244059	-4.76099	-0.784716	0.164822	-1.72275	-0.784716	1.56844	0.00283821
245695_at	Tceanc	TCEANC	transcription elongation factor A (SII) N-terminal and central domain containing	245695	3.73027	0.721197	0.193336	1.64855	0.721197	3.1074	0.00711918
26410_at	Map3k8	MAP3K8	mitogen-activated protein kinase kinase kinase 8	26410	-4.89336	-0.982171	0.200715	-1.97544	-0.982171	1.56844	0.00255381
26611_at	Rcn2	RCN2	reticulocalbin 2	26611	-3.71349	-0.649598	0.174929	-1.56873	-0.649598	3.1074	0.00727134
266781_at	Snx17	SNX17	sorting nexin 17	266781	3.39987	0.631337	0.185695	1.549	0.631337	3.61437	0.00989459
269181_at	Mgat4a	MGAT4A	mannoside acetylglucosaminyltransferase 4, isoenzyme A	269181	-3.45906	-0.774964	0.224039	-1.71115	-0.774964	3.61437	0.00949566
269941_at	Chsy1	CHSY1	chondroitin sulfate synthase 1	269941	-13.4771	-1.19045	0.0883316	-2.28224	-1.19045	0	7.27605e-05
27007_at	Klrk1	KLRC4-KLRK1	killer cell lectin-like receptor subfamily K, member 1	27007	-5.34189	-0.90274	0.168993	-1.86961	-0.90274	0.521901	0.00170337
317757_at	Gimap5	GIMAP1-GIMAP5	GTPase, IMAP family member 5	317757	-2.95624	-1.14713	0.388035	-2.21472	-1.14713	4.56391	0.0153923
319710_at	Frmd6	FRMD6	FERM domain containing 6	319710	-5.66464	-0.596167	0.105244	-1.5117	-0.596167	0.449306	0.00131716
319719_at	Simc1	SIMC1	SUMO-interacting motifs containing 1	319719	-5.09919	-1.37385	0.269425	-2.59162	-1.37385	1.02325	0.00212167
320770_at	A630072M18Rik	APTR	RIKEN cDNA A630072M18 gene	320770	-5.5803	-1.71852	0.307961	-3.29097	-1.71852	0.521901	0.00142561
327766_at	Tmem26	SRCAP	transmembrane protein 26	327766	2.98285	1.00011	0.335286	2.00015	1.00011	4.56391	0.0149474
328066_at	LOC328066	---	uncharacterized LOC328066	328066	-5.49505	-0.648196	0.11796	-1.56721	-0.648196	0.521901	0.00146213
330192_at	Vps37b	VPS37B	vacuolar protein sorting 37B	330192	-3.83757	-0.713158	0.185836	-1.63939	-0.713158	2.63314	0.00646572
330671_at	B4galnt4	B4GALNT3	beta-1,4-N-acetyl-galactosaminyl transferase 4	330671	7.28844	1.15007	0.157794	2.21925	1.15007	0	0.000471145
381379_at	Med19	MED19	mediator complex subunit 19	381379	4.69783	0.591671	0.125946	1.50699	0.591671	1.50552	0.00304681
381410_at	Zfp408	ZNF408	zinc finger protein 408	381410	4.97242	0.695605	0.139893	1.61956	0.695605	1.50552	0.00240331
381650_at	Thap6	---	THAP domain containing 6	381650	-4.73456	-0.885595	0.187049	-1.84753	-0.885595	1.56844	0.00294887
384783_at	Irs2	IRS1	insulin receptor substrate 2	384783	-7.40238	-1.49616	0.202119	-2.82091	-1.49616	0	0.000461185
386655_at	Eid2	EID2	EP300 interacting inhibitor of differentiation 2	386655	5.87436	0.667621	0.11365	1.58845	0.667621	0.521901	0.00117274
399603_at	Fam84b	FAM84B	family with sequence similarity 84, member B	399603	-12.1529	-0.800945	0.0659056	-1.74224	-0.800945	0	9.26797e-05
403187_at	Opa3	OPA3	optic atrophy 3	403187	-7.73771	-0.954363	0.123339	-1.93772	-0.954363	0	0.00034997
414108_at	9230114K14Rik	---	RIKEN cDNA 9230114K14 gene	414108	-3.80712	-1.21571	0.319327	-2.32256	-1.21571	2.63314	0.00667764
433022_at	Plcxd2	PLCXD2	phosphatidylinositol-specific phospholipase C, X domain containing 2	433022	-4.65603	-1.08044	0.232051	-2.11468	-1.08044	1.56844	0.00317573
474156_at	Zbtb9	ZBTB9	zinc finger and BTB domain containing 9	474156	5.87259	0.801853	0.136542	1.74334	0.801853	0.521901	0.00117772
50527_at	Ero1l	ERO1A	ERO1-like (S. cerevisiae)	50527	-5.46633	-0.80308	0.146914	-1.74482	-0.80308	0.521901	0.00151192
50766_at	Crim1	CRIM1	cysteine rich transmembrane BMP regulator 1 (chordin like)	50766	-3.30323	-0.751968	0.227646	-1.68409	-0.751968	3.61437	0.0108966
50769_at	Atp8a2	ATP11A	ATPase, aminophospholipid transporter-like, class I, type 8A, member 2	50769	-5.20931	-0.670604	0.128732	-1.59174	-0.670604	1.02325	0.00193742
50930_at	Tnfsf14	TNFSF14	tumor necrosis factor (ligand) superfamily, member 14	50930	-4.94391	-0.639778	0.129407	-1.55809	-0.639778	1.56844	0.00247469
51960_at	Kctd18	KCTD18	potassium channel tetramerisation domain containing 18	51960	6.17009	0.622729	0.100927	1.53979	0.622729	0.31956	0.000985725
52118_at	Pvr	PVR	poliovirus receptor	52118	-4.27074	-0.682806	0.15988	-1.60526	-0.682806	2.10479	0.00446605
52469_at	Coa3	COA3	cytochrome C oxidase assembly factor 3	52469	8.48535	0.837187	0.0986627	1.78656	0.837187	0	0.000270293
53322_at	Nucb2	NUCB2	nucleobindin 2	53322	3.68106	0.597528	0.162325	1.51312	0.597528	3.1074	0.0074888
53881_at	Slc5a3	SLC5A11	solute carrier family 5 (inositol transporters), member 3	53881	-3.23835	-0.736202	0.227339	-1.66578	-0.736202	3.98916	0.0115435
53902_at	Rcan3	RCAN3	regulator of calcineurin 3	53902	4.39619	0.67845	0.154327	1.60042	0.67845	2.10479	0.00399961
53975_at	Ddx20	DDX20	DEAD (Asp-Glu-Ala-Asp) box polypeptide 20	53975	3.62976	0.625763	0.172398	1.54303	0.625763	3.1074	0.00787611
54139_at	Irf6	IRF6	interferon regulatory factor 6	54139	4.06581	0.756961	0.186177	1.68993	0.756961	2.63314	0.00528274
54215_at	Cd160	CD160	CD160 antigen	54215	-7.00094	-0.986761	0.140947	-1.98173	-0.986761	0	0.000609473
545725_at	Mterf1a	MTERF1	mitochondrial transcription termination factor 1a	545725	2.99003	0.617849	0.206637	1.53459	0.617849	4.56391	0.0148174
54723_at	Tfip11	TFIP11	tuftelin interacting protein 11	54723	-4.7458	-0.973275	0.205081	-1.96329	-0.973275	1.56844	0.0029035
55942_at	Sertad1	SERTAD1	SERTA domain containing 1	55942	-6.61352	-0.923631	0.139658	-1.89688	-0.923631	0.449306	0.000776019
56174_at	Nagk	NAGK	N-acetylglucosamine kinase	56174	8.80515	0.631806	0.0717541	1.5495	0.631806	0	0.000224368
56190_at	Rbm38	RBM24	RNA binding motif protein 38	56190	-5.25199	-0.914514	0.174127	-1.88493	-0.914514	1.02325	0.00185332
56434_at	Tspan3	TSPAN3	tetraspanin 3	56434	5.38811	0.864601	0.160465	1.82084	0.864601	1.02325	0.0016165
56437_at	Rrad	RRAD	Ras-related associated with diabetes	56437	-6.94479	-1.21606	0.175105	-2.32312	-1.21606	0	0.000644331
56468_at	Socs5	SOCS5	suppressor of cytokine signaling 5	56468	-5.61055	-0.821611	0.14644	-1.76738	-0.821611	0.521901	0.00136751
56615_at	Mgst1	MGST1	microsomal glutathione S-transferase 1	56615	3.74449	0.867675	0.231721	1.82472	0.867675	3.1074	0.00702014
56644_at	Clec7a	CLEC7A	C-type lectin domain family 7, member a	56644	3.55042	0.670584	0.188874	1.59172	0.670584	3.61437	0.00853455
56696_at	Gpr132	GPR132	G protein-coupled receptor 132	56696	-5.79491	-0.710348	0.122581	-1.6362	-0.710348	0.449306	0.00121203
56760_at	Clec1b	CLEC1B	C-type lectin domain family 1, member b	56760	3.41462	0.81617	0.239023	1.76073	0.81617	3.61437	0.00979112
56844_at	Tssc4	TSSC4	tumor-suppressing subchromosomal transferable fragment 4	56844	4.38426	0.586988	0.133885	1.50211	0.586988	2.10479	0.00404056
57259_at	Tob2	TOB2	transducer of ERBB2, 2	57259	-7.10041	-1.02618	0.144524	-2.03662	-1.02618	0	0.000524263
57748_at	Jmy	JMY	junction-mediating and regulatory protein	57748	-5.58686	-1.12045	0.200551	-2.17415	-1.12045	0.521901	0.00140735
57765_at	Tbx21	TBX21	T-box 21	57765	-10.8534	-0.718809	0.0662291	-1.64582	-0.718809	0	0.000112599
58205_at	Pdcd1lg2	PDCD1LG2	programmed cell death 1 ligand 2	58205	-11.3237	-1.56303	0.138032	-2.95474	-1.56303	0	0.000107619
59014_at	Rrs1	RRS1	ribosome biogenesis regulator 1	59014	4.33047	0.620132	0.143202	1.53702	0.620132	2.10479	0.00422979
60533_at	Cd274	CD274	CD274 antigen	60533	-6.41067	-0.752472	0.117378	-1.68468	-0.752472	0.449306	0.000865656
606736_at	C920009B18Rik	---	RIKEN cDNA C920009B18 gene	606736	-4.23765	-0.847199	0.199922	-1.79901	-0.847199	2.10479	0.00462596
622976_at	Gm6377	---	predicted gene 6377	622976	3.37884	1.0546	0.31212	2.07715	1.0546	3.61437	0.0101392
63953_at	Dusp10	DUSP10	dual specificity phosphatase 10	63953	-3.36389	-0.68471	0.203547	-1.60738	-0.68471	3.61437	0.0102952
64707_at	Suv39h2	SUV39H2	suppressor of variegation 3-9 2	64707	-4.51397	-0.592003	0.131149	-1.50734	-0.592003	1.56844	0.00356748
65972_at	Ifi30	IFI30	interferon gamma inducible protein 30	65972	2.95817	0.693834	0.234548	1.61758	0.693834	4.56391	0.0153608
66233_at	Dmap1	DMAP1	DNA methyltransferase 1-associated protein 1	66233	3.01021	0.685632	0.227769	1.60841	0.685632	4.56391	0.0144793
66234_at	Msmo1	MSMO1	methylsterol monoxygenase 1	66234	-2.89908	-0.668911	0.230732	-1.58987	-0.668911	4.56391	0.0163794
66358_at	Adprm	ADPRM	ADP-ribose/CDP-alcohol diphosphatase, manganese dependent	66358	5.3052	0.656526	0.123752	1.57628	0.656526	1.02325	0.00176755
66408_at	Aptx	APTX	aprataxin	66408	4.41651	0.587815	0.133095	1.50297	0.587815	2.10479	0.00392381
66420_at	Polr2e	POLR2E	polymerase (RNA) II (DNA directed) polypeptide E	66420	8.1334	0.701483	0.0862472	1.62618	0.701483	0	0.000310131
66446_at	Exosc7	EXOSC7	exosome component 7	66446	4.56576	0.595085	0.130336	1.51056	0.595085	1.50552	0.00340093
664862_at	Gpr137b-ps	---	G protein-coupled receptor 137B, pseudogene	664862	6.89901	0.59663	0.0864805	1.51218	0.59663	0.31956	0.00067919
66538_at	Rps19bp1	RPS19BP1	ribosomal protein S19 binding protein 1	66538	6.31409	0.80432	0.127385	1.74632	0.80432	0.31956	0.000930947
666339_at	Muc3	MUC12	mucin 3, intestinal	666339	-6.93132	-1.64175	0.23686	-3.12045	-1.64175	0	0.000649311
666926_at	Gm8369	---	predicted gene 8369	666926	-5.04719	-0.888372	0.176013	-1.85109	-0.888372	1.02325	0.0022423
667118_at	Zbed6	ZBED6	zinc finger, BED type containing 6	667118	-3.14584	-0.680032	0.216169	-1.60218	-0.680032	3.98916	0.0126866
667373_at	Ifit1bl1	IFIT1	interferon induced protein with tetratricpeptide repeats 1B like 1	667373	3.16519	0.834046	0.263506	1.78268	0.834046	3.98916	0.0123275
66953_at	Cdca7	CDCA7	cell division cycle associated 7	66953	3.61983	0.760973	0.210223	1.69463	0.760973	3.61437	0.00795911
66961_at	Neat1	NEAT1	nuclear paraspeckle assembly transcript 1 (non-protein coding)	66961	9.07457	0.608277	0.0670309	1.52444	0.608277	0	0.000189509
66971_at	Cdk5rap1	CDK5RAP1	CDK5 regulatory subunit associated protein 1	66971	7.47897	1.51369	0.202393	2.8554	1.51369	0	0.000427986
67019_at	Actr6	ACTR6	ARP6 actin-related protein 6	67019	4.27545	0.689952	0.161375	1.61323	0.689952	2.10479	0.00443839
67020_at	Tmem88	TMEM88	transmembrane protein 88	67020	-7.63473	-1.36127	0.1783	-2.56912	-1.36127	0	0.000379848
67049_at	Pus3	PUS3	pseudouridine synthase 3	67049	5.75137	0.676995	0.11771	1.59881	0.676995	0.521901	0.00123527
67168_at	Lpar6	LPAR6	lysophosphatidic acid receptor 6	67168	6.73365	0.812693	0.120691	1.75649	0.812693	0.31956	0.000723455
67171_at	Dram2	DRAM2	DNA-damage regulated autophagy modulator 2	67171	3.94787	0.644345	0.163213	1.56303	0.644345	2.63314	0.00593454
67220_at	Plekho1	PLEKHO1	pleckstrin homology domain containing, family O member 1	67220	6.13812	1.00243	0.163312	2.00337	1.00243	0.31956	0.000995684
67230_at	Zfp329	ZNF263	zinc finger protein 329	67230	7.01307	0.750952	0.107079	1.6829	0.750952	0.31956	0.000604493
67246_at	2810474O19Rik	---	RIKEN cDNA 2810474O19 gene	67246	-5.48971	-0.785017	0.142998	-1.72311	-0.785017	0.521901	0.00146711
67263_at	Zswim6	ZSWIM5	zinc finger SWIM-type containing 6	67263	-2.87592	-0.753927	0.262152	-1.68638	-0.753927	4.56391	0.0167949
67266_at	Fam69a	FAM69A	family with sequence similarity 69, member A	67266	4.30684	0.831758	0.193125	1.77985	0.831758	2.10479	0.00432883
67279_at	Med31	MED31	mediator complex subunit 31	67279	-3.6575	-0.608278	0.16631	-1.52444	-0.608278	3.1074	0.00762491
67392_at	4833420G17Rik	C5orf34	RIKEN cDNA 4833420G17 gene	67392	4.91678	0.718941	0.146222	1.64597	0.718941	1.50552	0.00253057
67480_at	Cwc25	CWC25	CWC25 spliceosome-associated protein	67480	-5.88681	-1.12884	0.191757	-2.18682	-1.12884	0.449306	0.00115504
67531_at	5730408K05Rik	---	RIKEN cDNA 5730408K05 gene	67531	-5.35726	-0.757222	0.141345	-1.69023	-0.757222	0.521901	0.0016497
67579_at	Cpeb4	CPEB2	cytoplasmic polyadenylation element binding protein 4	67579	-7.52784	-0.679243	0.0902308	-1.6013	-0.679243	0	0.000399768
677168_at	Gm9706	---	predicted gene 9706	677168	-8.91925	-0.969278	0.108673	-1.95786	-0.969278	0	0.000209428
67742_at	Samsn1	SAMSN1	SAM domain, SH3 domain and nuclear localization signals, 1	67742	-4.08745	-0.817688	0.200048	-1.76258	-0.817688	2.10479	0.00518259
67760_at	Slc38a2	SLC38A2	solute carrier family 38, member 2	67760	-7.49682	-0.743309	0.0991499	-1.67401	-0.743309	0	0.000404747
67800_at	Dgat2	DGAT2	diacylglycerol O-acyltransferase 2	67800	-3.63415	-0.653563	0.179839	-1.57305	-0.653563	3.1074	0.00782023
67876_at	Coq10b	COQ10A	coenzyme Q10B	67876	-3.67504	-0.87255	0.237426	-1.8309	-0.87255	3.1074	0.00752919
67912_at	1600012H06Rik	C6orf120	RIKEN cDNA 1600012H06 gene	67912	5.55524	0.752006	0.135369	1.68413	0.752006	1.02325	0.00145217
68023_at	Pdf	PDF	peptide deformylase (mitochondrial)	68023	5.37196	0.616146	0.114697	1.53277	0.616146	1.02325	0.00164472
68151_at	Wls	WLS	wntless WNT ligand secretion mediator	68151	-9.05292	-1.15037	0.127072	-2.21971	-1.15037	0	0.000194489
68202_at	Ndufa5	NDUFA5	NADH dehydrogenase (ubiquinone) 1 alpha subcomplex, 5	68202	4.58116	0.697362	0.152224	1.62154	0.697362	1.50552	0.00332291
68275_at	Rpa1	RPA1	replication protein A1	68275	5.003	0.770765	0.154061	1.70617	0.770765	1.50552	0.00234244
68327_at	Tsr3	TSR3	TSR3 20S rRNA accumulation	68327	3.65874	0.603892	0.165055	1.51981	0.603892	3.1074	0.00761495
68337_at	Crip2	CRIP1	cysteine rich protein 2	68337	2.89576	0.61804	0.213429	1.53479	0.61804	4.56391	0.0164425
68404_at	Nrn1	NRN1	neuritin 1	68404	-3.45011	-0.585562	0.169722	-1.50062	-0.585562	3.61437	0.00956703
68481_at	Mpzl1	MPZL1	myelin protein zero-like 1	68481	2.87793	0.741958	0.25781	1.67244	0.741958	4.56391	0.0167457
68634_at	Tm2d3	TM2D3	TM2 domain containing 3	68634	7.15258	0.683326	0.0955355	1.60584	0.683326	0.31956	0.000491064
68735_at	Mrps18c	MRPS18C	mitochondrial ribosomal protein S18C	68735	4.41106	0.604543	0.137051	1.5205	0.604543	2.10479	0.00394871
68939_at	Rasl11b	RASL11B	RAS-like, family 11, member B	68939	-15.1832	-1.21844	0.0802488	-2.32695	-1.21844	0	5.78211e-05
69053_at	1810013L24Rik	C16orf72	RIKEN cDNA 1810013L24 gene	69053	-4.11229	-0.664058	0.161482	-1.58453	-0.664058	2.10479	0.00508078
69076_at	Triap1	TRIAP1	TP53 regulated inhibitor of apoptosis 1	69076	4.92786	0.67211	0.13639	1.5934	0.67211	1.50552	0.00248963
69109_at	Fam58b	CCNQ	family with sequence similarity 58, member B	69109	3.7684	0.75027	0.199095	1.68211	0.75027	3.1074	0.00687573
69126_at	1810022K09Rik	C8orf59	RIKEN cDNA 1810022K09 gene	69126	4.69995	0.712556	0.151609	1.6387	0.712556	1.50552	0.00303685
69163_at	Mrpl44	MRPL44	mitochondrial ribosomal protein L44	69163	7.68677	0.825911	0.107446	1.77265	0.825911	0	0.000364909
69185_at	Dtwd1	DTWD1	DTW domain containing 1	69185	4.11074	0.765517	0.186224	1.69998	0.765517	2.63314	0.00510236
69225_at	Naxd	NAXD	NAD(P)HX dehydratase	69225	6.79901	0.611713	0.089971	1.52807	0.611713	0.31956	0.000694129
69769_at	Tnfaip8l2	TNFAIP8L2	tumor necrosis factor, alpha-induced protein 8-like 2	69769	5.9591	0.735083	0.123355	1.66449	0.735083	0.521901	0.00110413
69821_at	Mterf4	MTERF4	mitochondrial transcription termination factor 4	69821	3.43809	0.713836	0.207626	1.64016	0.713836	3.61437	0.00966442
69962_at	Mettl18	METTL18	methyltransferase like 18	69962	3.59561	0.888625	0.247141	1.85141	0.888625	3.61437	0.00816937
69993_at	Chn2	AC004593.3	chimerin 2	69993	-2.87087	-0.622149	0.216711	-1.53917	-0.622149	4.56391	0.0168597
70314_at	Rabep2	RABEP2	rabaptin, RAB GTPase binding effector protein 2	70314	3.37248	0.59227	0.175618	1.50762	0.59227	3.61437	0.0101784
70439_at	Taf15	TAF15	TATA-box binding protein associated factor 15	70439	-2.91775	-0.780293	0.26743	-1.71748	-0.780293	4.56391	0.0161039
70686_at	Dusp16	DUSP16	dual specificity phosphatase 16	70686	-2.79203	-0.590898	0.211637	-1.50618	-0.590898	4.56391	0.0184748
71409_at	Fmnl2	FMNL1	formin-like 2	71409	3.24141	0.924325	0.285161	1.8978	0.924325	3.98916	0.0115097
71602_at	Myo1e	MYO1E	myosin IE	71602	-3.87144	-0.653533	0.168809	-1.57302	-0.653533	2.63314	0.00629918
71690_at	Esm1	ESM1	endothelial cell-specific molecule 1	71690	5.38312	1.28135	0.238032	2.43067	1.28135	1.02325	0.00162646
71726_at	Smug1	SMUG1	single-strand selective monofunctional uracil DNA glycosylase	71726	4.06289	0.60311	0.148444	1.51899	0.60311	2.63314	0.00531041
71878_at	Fam83d	FAM83D	family with sequence similarity 83, member D	71878	-3.24419	-0.744652	0.229534	-1.67557	-0.744652	3.98916	0.0114522
71919_at	Rpap3	RPAP3	RNA polymerase II associated protein 3	71919	5.66868	0.743083	0.131086	1.67375	0.743083	0.521901	0.00131218
71986_at	Ddx28	DDX28	DEAD (Asp-Glu-Ala-Asp) box polypeptide 28	71986	5.7054	0.714144	0.12517	1.64051	0.714144	0.521901	0.00127732
72033_at	Tsc22d2	TSC22D2	TSC22 domain family, member 2	72033	-5.58051	-0.598917	0.107323	-1.51458	-0.598917	0.521901	0.00142063
72041_at	Alkbh4	ALKBH4	alkB homolog 4, lysine demethylase	72041	7.48769	0.636801	0.0850464	1.55488	0.636801	0	0.000423007
72097_at	2010300C02Rik	KIAA1211L	RIKEN cDNA 2010300C02 gene	72097	-7.06136	-1.25116	0.177185	-2.38033	-1.25116	0	0.000545289
72139_at	2610044O15Rik8	AC008770.1	RIKEN cDNA 2610044O15 gene	72139	3.0662	0.652019	0.212647	1.57137	0.652019	4.56391	0.0137163
72148_at	Tdrp	TDRP	testis development related protein	72148	5.61	0.854359	0.152292	1.80795	0.854359	1.02325	0.00137249
72310_at	Nkg7	NKG7	natural killer cell group 7 sequence	72310	-8.62141	-1.00285	0.116321	-2.00396	-1.00285	0	0.000240414
72500_at	Ier5l	IER5L	immediate early response 5-like	72500	-4.50632	-0.996524	0.221139	-1.99519	-0.996524	1.56844	0.00362557
72504_at	Taf4b	TAF4B	TATA-box binding protein associated factor 4b	72504	-3.47362	-0.905349	0.260636	-1.873	-0.905349	3.61437	0.00932966
72552_at	Hsdl1	HSDL1	hydroxysteroid dehydrogenase like 1	72552	4.78795	0.74068	0.154697	1.67096	0.74068	1.50552	0.00278897
73172_at	Exo5	EXO5	exonuclease 5	73172	7.02455	0.829053	0.118022	1.77652	0.829053	0.31956	0.000581254
73225_at	Fam118a	FAM118A	family with sequence similarity 118, member A	73225	5.59606	0.621784	0.111111	1.53878	0.621784	1.02325	0.00138743
73451_at	Zfp763	ZNF669	zinc finger protein 763	73451	3.53382	0.724869	0.205123	1.65275	0.724869	3.61437	0.00866901
73467_at	1700066M21Rik	C2orf69	RIKEN cDNA 1700066M21 gene	73467	3.58326	0.693699	0.193594	1.61742	0.693699	3.61437	0.00828003
73747_at	1110034G24Rik	---	RIKEN cDNA 1110034G24 gene	73747	5.10886	0.646008	0.126449	1.56483	0.646008	1.50552	0.00210341
73847_at	Fam110a	FAM110A	family with sequence similarity 110, member A	73847	-3.35788	-1.05294	0.313572	-2.07475	-1.05294	3.61437	0.010376
74041_at	Ddias	DDIAS	DNA damage-induced apoptosis suppressor	74041	-3.92656	-0.960432	0.244599	-1.94589	-0.960432	2.63314	0.00606125
74121_at	Acoxl	ACOXL	acyl-Coenzyme A oxidase-like	74121	-5.97511	-0.952515	0.159414	-1.93524	-0.952515	0.449306	0.00109915
74155_at	Errfi1	ERRFI1	ERBB receptor feedback inhibitor 1	74155	-5.25768	-1.10936	0.210999	-2.15751	-1.10936	1.02325	0.00184336
74318_at	Hopx	HOPX	HOP homeobox	74318	-5.30845	-0.600422	0.113107	-1.51616	-0.600422	1.02325	0.00175759
74600_at	Mrpl47	MRPL47	mitochondrial ribosomal protein L47	74600	5.17083	0.666836	0.128961	1.58759	0.666836	1.50552	0.00200824
74737_at	Pcf11	PCF11	PCF11 cleavage and polyadenylation factor subunit	74737	-6.23794	-0.824462	0.132169	-1.77087	-0.824462	0.449306	0.000950866
74777_at	Selenon	AL020996.2	selenoprotein N	74777	-4.14853	-0.966826	0.233053	-1.95454	-0.966826	2.10479	0.00495574
75284_at	Bcdin3d	BCDIN3D	BCDIN3 domain containing	75284	6.77652	0.801937	0.11834	1.74344	0.801937	0.31956	0.000699109
75767_at	Rab11fip1	RAB11FIP1	RAB11 family interacting protein 1 (class I)	75767	-6.01616	-0.606965	0.100889	-1.52305	-0.606965	0.449306	0.00105821
75869_at	Arl5b	ARL5A	ADP-ribosylation factor-like 5B	75869	-10.264	-1.56263	0.152243	-2.95393	-1.56263	0	0.000127538
76477_at	Pcolce2	PCOLCE2	procollagen C-endopeptidase enhancer 2	76477	3.76226	0.783857	0.208347	1.72173	0.783857	3.1074	0.00691003
76566_at	Rflnb	RFLNB	refilin B	76566	4.08788	0.936388	0.229064	1.91373	0.936388	2.63314	0.00517761
77087_at	Ankrd11	ANKRD11	ankyrin repeat domain 11	77087	-2.78594	-0.952513	0.3419	-1.93524	-0.952513	4.56391	0.0186115
77805_at	Esco1	ESCO1	establishment of sister chromatid cohesion N-acetyltransferase 1	77805	-4.10108	-0.804505	0.196169	-1.74655	-0.804505	2.10479	0.00512892
78670_at	Plekhj1	PLEKHJ1	pleckstrin homology domain containing, family J member 1	78670	-4.05907	-0.655482	0.161486	-1.57514	-0.655482	2.63314	0.00534029
80290_at	Gpr146	GPR146	G protein-coupled receptor 146	80290	4.47807	0.879889	0.196489	1.84023	0.879889	2.10479	0.00372019
80859_at	Nfkbiz	NFKBIZ	nuclear factor of kappa light polypeptide gene enhancer in B cells inhibitor, zeta	80859	-7.45143	-0.798977	0.107225	-1.73987	-0.798977	0	0.000441266
80915_at	Dusp12	DUSP12	dual specificity phosphatase 12	80915	13.8978	0.586731	0.0422174	1.50184	0.586731	0	6.77807e-05
83485_at	Ngrn	AC091167.6	neugrin, neurite outgrowth associated	83485	4.67651	0.61576	0.131671	1.53237	0.61576	1.50552	0.00311929
83672_at	Sytl3	SYTL3	synaptotagmin-like 3	83672	-3.26191	-0.85648	0.26257	-1.81061	-0.85648	3.98916	0.0112668
83924_at	Gpr137b	GPR137B	G protein-coupled receptor 137B	83924	4.28271	1.22336	0.285651	2.3349	1.22336	2.10479	0.00440353
97159_at	A430005L14Rik	C1orf174	RIKEN cDNA A430005L14 gene	97159	3.37821	0.675519	0.199963	1.59717	0.675519	3.61437	0.0101441
98396_at	Slc41a1	SLC41A1	solute carrier family 41, member 1	98396	-7.83225	-0.790457	0.100923	-1.72962	-0.790457	0	0.00033503
98404_at	AI597479	C2orf49	expressed sequence AI597479	98404	3.39647	0.640393	0.188546	1.55875	0.640393	3.61437	0.00991562
98488_at	Gtf3c3	GTF3C3	general transcription factor IIIC, polypeptide 3	98488	3.07985	0.628035	0.203917	1.54546	0.628035	4.56391	0.0134989
99010_at	Lpcat4	LPCAT4	lysophosphatidylcholine acyltransferase 4	99010	-4.08233	-0.903692	0.221367	-1.87085	-0.903692	2.10479	0.00520251
