# Supplementary material for: P2X7 Receptor Activity Limits Accumulation of T Cells within Tumors
Source: Oxford University Press journal article supplement (doi:10.1158/0008-5472.can-19-3807), 2020-07-22
Supplement: 00085472can193807-sup-233448_3_supp_6362874_qc0xw8.xlsx [file 00085472can193807-sup-233448_3_supp_6362874_qc0xw8.xlsx]

## Sheet: Sheet1
Extended Data Table 2: list of up-regulated genes in P2rx7-/- vs WT (q-value %<5 and absolute fold change>1.5) used in the analysis of GSE90728 lung data, of the NSCLC compendium, and of the TCGA SKCM
ProbeID	Symbol_mm	Symbol_hs	EntrezID
100040608_at	Fancf	FANCF	100040608
100043468_at	Zfp955b	ZNF669	100043468
100206_at	Adprhl2	ADPRHL2	100206
101489_at	Ric8a	RIC8A	101489
101602_at	AI467606	C16orf54	101602
105446_at	Gmpr2	GMPR	105446
108098_at	Med21	MED21	108098
108755_at	Lyrm2	LYRM2	108755
109075_at	Exosc4	EXOSC4	109075
116748_at	Lsm10	LSM10	116748
117171_at	1110038F14Rik	C8orf33	117171
11770_at	Fabp4	FABP3	11770
11816_at	Apoe	APOE	11816
12323_at	Camk2b	CAMK1	12323
12475_at	Cd14	CD14	12475
12476_at	Cd151	CD151	12476
12632_at	Cfl2	CFL1	12632
12766_at	Cxcr3	CXCR3	12766
12807_at	Hps3	HPS3	12807
13036_at	Ctsh	CTSH	13036
13494_at	Drg1	DRG1	13494
140795_at	P2ry14	P2RY14	140795
14131_at	Fcgr3	FCGR2A	14131
14825_at	Cxcl1	CXCL1	14825
14911_at	Thumpd3	THUMPD3	14911
15013_at	H2-Q2	HLA-A	15013
16175_at	Il1a	IL1A	16175
16534_at	Kcnn4	KCNN4	16534
16619_at	Klk1b27	KLK1	16619
16854_at	Lgals3	LGALS3	16854
170741_at	Pilrb1	PILRA	170741
170748_at	Smco4	SMCO4	170748
17279_at	Melk	MELK	17279
17476_at	Mpeg1	MPEG1	17476
17533_at	Mrc1	MRC1	17533
17828_at	Bloc1s5	BLOC1S5	17828
18100_at	Mrpl40	MRPL40	18100
18645_at	Pfn2	PFN1	18645
19016_at	Pparg	PPARG	19016
19302_at	Pex2	PEX2	19302
195040_at	Tmem199	TMEM199	195040
20363_at	Selenop	SELENOP	20363
20556_at	Slfn2	SLFN12	20556
210148_at	Slc30a6	SLC30A6	210148
210529_at	Mettl14	METTL14	210529
211389_at	Suox	SUOX	211389
212276_at	Zfp748	ZNF107	212276
216274_at	Cep290	CEP290	216274
217038_at	Mrm1	MRM1	217038
21810_at	Tgfbi	TGFBI	21810
21817_at	Tgm2	TGM2	21817
218311_at	Zfp455	ZNF138	218311
219072_at	Haus4	AL132780.3	219072
22177_at	Tyrobp	TYROBP	22177
224694_at	Zfp81	AC008758.6	224694
225020_at	Fez2	FEZ2	225020
225027_at	Srsf7	SRSF7	225027
22635_at	Zan	ZAN	22635
22712_at	Zfp54	ZNF254	22712
228998_at	Arfgap1	ARFGAP1	228998
233189_at	Ctu1	CTU1	233189
234413_at	Zfp961	ZNF101	234413
238693_at	Zfp58	C9orf85	238693
240064_at	Zfp799	AC008758.6	240064
240120_at	Zfp119b	ZNF101	240120
241303_at	Fam78a	FAM78A	241303
245695_at	Tceanc	TCEANC	245695
266781_at	Snx17	SNX17	266781
327766_at	Tmem26	SRCAP	327766
330671_at	B4galnt4	B4GALNT3	330671
381379_at	Med19	MED19	381379
381410_at	Zfp408	ZNF408	381410
386655_at	Eid2	EID2	386655
474156_at	Zbtb9	ZBTB9	474156
51960_at	Kctd18	KCTD18	51960
52469_at	Coa3	COA3	52469
53322_at	Nucb2	NUCB2	53322
53902_at	Rcan3	RCAN3	53902
53975_at	Ddx20	DDX20	53975
54139_at	Irf6	IRF6	54139
545725_at	Mterf1a	MTERF1	545725
56174_at	Nagk	NAGK	56174
56434_at	Tspan3	TSPAN3	56434
56615_at	Mgst1	MGST1	56615
56644_at	Clec7a	CLEC7A	56644
56760_at	Clec1b	CLEC1B	56760
56844_at	Tssc4	TSSC4	56844
59014_at	Rrs1	RRS1	59014
65972_at	Ifi30	IFI30	65972
66233_at	Dmap1	DMAP1	66233
66358_at	Adprm	ADPRM	66358
66408_at	Aptx	APTX	66408
66420_at	Polr2e	POLR2E	66420
66446_at	Exosc7	EXOSC7	66446
66538_at	Rps19bp1	RPS19BP1	66538
667373_at	Ifit1bl1	IFIT1	667373
66953_at	Cdca7	CDCA7	66953
66961_at	Neat1	NEAT1	66961
66971_at	Cdk5rap1	CDK5RAP1	66971
67019_at	Actr6	ACTR6	67019
67049_at	Pus3	PUS3	67049
67168_at	Lpar6	LPAR6	67168
67171_at	Dram2	DRAM2	67171
67220_at	Plekho1	PLEKHO1	67220
67230_at	Zfp329	ZNF263	67230
67266_at	Fam69a	FAM69A	67266
67392_at	4833420G17Rik	C5orf34	67392
67912_at	1600012H06Rik	C6orf120	67912
68023_at	Pdf	PDF	68023
68202_at	Ndufa5	NDUFA5	68202
68275_at	Rpa1	RPA1	68275
68327_at	Tsr3	TSR3	68327
68337_at	Crip2	CRIP1	68337
68481_at	Mpzl1	MPZL1	68481
68634_at	Tm2d3	TM2D3	68634
68735_at	Mrps18c	MRPS18C	68735
69076_at	Triap1	TRIAP1	69076
69109_at	Fam58b	CCNQ	69109
69126_at	1810022K09Rik	C8orf59	69126
69163_at	Mrpl44	MRPL44	69163
69185_at	Dtwd1	DTWD1	69185
69225_at	Naxd	NAXD	69225
69769_at	Tnfaip8l2	TNFAIP8L2	69769
69821_at	Mterf4	MTERF4	69821
69962_at	Mettl18	METTL18	69962
70314_at	Rabep2	RABEP2	70314
71409_at	Fmnl2	FMNL1	71409
71690_at	Esm1	ESM1	71690
71726_at	Smug1	SMUG1	71726
71919_at	Rpap3	RPAP3	71919
71986_at	Ddx28	DDX28	71986
72041_at	Alkbh4	ALKBH4	72041
72139_at	2610044O15Rik8	AC008770.1	72139
72148_at	Tdrp	TDRP	72148
72552_at	Hsdl1	HSDL1	72552
73172_at	Exo5	EXO5	73172
73225_at	Fam118a	FAM118A	73225
73451_at	Zfp763	ZNF669	73451
73467_at	1700066M21Rik	C2orf69	73467
74600_at	Mrpl47	MRPL47	74600
75284_at	Bcdin3d	BCDIN3D	75284
76477_at	Pcolce2	PCOLCE2	76477
76566_at	Rflnb	RFLNB	76566
80290_at	Gpr146	GPR146	80290
80915_at	Dusp12	DUSP12	80915
83485_at	Ngrn	AC091167.6	83485
83924_at	Gpr137b	GPR137B	83924
97159_at	A430005L14Rik	C1orf174	97159
98404_at	AI597479	C2orf49	98404
98488_at	Gtf3c3	GTF3C3	98488
