# Supplementary material for: P2X7 Receptor Activity Limits Accumulation of T Cells within Tumors
Source: Oxford University Press journal article supplement (doi:10.1158/0008-5472.can-19-3807), 2020-07-22
Supplement: 00085472can193807-sup-233448_3_supp_6362876_qc0xw8.xlsx [file 00085472can193807-sup-233448_3_supp_6362876_qc0xw8.xlsx]

## Sheet: Sheet1
Extended Data Table 3: differentially expressed genes in the comparison P2rx7-/- vs WT (q-value %<5 and absolute fold change>2)
ProbeID	Symbol_mm	Symbol_hs	Description	EntrezID	Score(d)	Numerator(r)	Denominator(s+s0)	Fold Change	logFG	q-value(%)	p-value
100504486_at	Gdap10	---	ganglioside-induced differentiation-associated-protein 10	100504486	-4.69762	-1.31657	0.280263	-2.49073	-1.31657	1.56844	0.00305179
101602_at	AI467606	C16orf54	expressed sequence AI467606	101602	9.84328	1.08392	0.110118	2.11979	1.08392	0	0.000142478
104215_at	Rhoq	RHOJ	ras homolog family member Q	104215	-5.03644	-1.03823	0.206143	-2.0537	-1.03823	1.02325	0.0022683
107932_at	Chd4	CHD3	chromodomain helicase DNA binding protein 4	107932	-4.89172	-1.06393	0.217496	-2.09061	-1.06393	1.56844	0.00256377
108167355_at	LOC108167355	---	uncharacterized LOC108167355	108167355	-3.25122	-1.19141	0.366449	-2.28375	-1.19141	3.98916	0.0113819
108960_at	Irak2	IRAK2	interleukin-1 receptor-associated kinase 2	108960	-4.16125	-1.04488	0.251097	-2.06319	-1.04488	2.10479	0.00492641
109019_at	Nabp1	NABP1	nucleic acid binding protein 1	109019	-3.74327	-1.02427	0.273629	-2.03393	-1.02427	3.1074	0.00702512
11605_at	Gla	GLA	galactosidase, alpha	11605	-3.69462	-1.3015	0.352269	-2.46485	-1.3015	3.1074	0.00737703
11816_at	Apoe	APOE	apolipoprotein E	11816	3.05759	1.05935	0.346467	2.084	1.05935	4.56391	0.0138154
11839_at	Areg	AREG	amphiregulin	11839	-8.0715	-2.00729	0.248689	-4.02027	-2.00729	0	0.000315111
12455_at	Ccnt1	CCNT1	cyclin T1	12455	-4.42156	-1.05414	0.23841	-2.07648	-1.05414	1.56844	0.00390721
12575_at	Cdkn1a	CDKN1A	cyclin-dependent kinase inhibitor 1A (P21)	12575	-5.31437	-1.47946	0.278388	-2.78844	-1.47946	1.02325	0.00174763
12577_at	Cdkn1c	CDKN1C	cyclin-dependent kinase inhibitor 1C (P57)	12577	-3.36869	-1.10357	0.327597	-2.14886	-1.10357	3.61437	0.0102399
12802_at	Cnr2	CNR2	cannabinoid receptor 2 (macrophage)	12802	-6.92893	-1.096	0.158177	-2.13761	-1.096	0	0.000659271
14538_at	Gcnt2	GCNT2	glucosaminyl (N-acetyl) transferase 2, I-branching enzyme	14538	-5.74142	-1.39156	0.242372	-2.62362	-1.39156	0.449306	0.00124523
14579_at	Gem	GEM	GTP binding protein (gene overexpressed in skeletal muscle)	14579	-3.38234	-1.25573	0.37126	-2.38787	-1.25573	3.61437	0.0100954
14744_at	Gpr65	GPR65	G-protein coupled receptor 65	14744	-6.7666	-1.10648	0.163521	-2.1532	-1.10648	0	0.000709069
14825_at	Cxcl1	CXCL1	chemokine (C-X-C motif) ligand 1	14825	2.8845	1.01602	0.352233	2.02233	1.01602	4.56391	0.0166212
15013_at	H2-Q2	HLA-A	histocompatibility 2, Q region locus 2	15013	7.21534	1.66333	0.230528	3.16748	1.66333	0.31956	0.000481104
15512_at	Hspa2	HSPA1A	heat shock protein 2	15512	-6.92906	-1.32063	0.190593	-2.49775	-1.32063	0	0.000654291
15978_at	Ifng	IFNG	interferon gamma	15978	-8.82777	-1.74232	0.197368	-3.34573	-1.74232	0	0.000219388
16175_at	Il1a	IL1A	interleukin 1 alpha	16175	3.12366	1.34854	0.431718	2.54654	1.34854	3.98916	0.0130424
16189_at	Il4	CSF2RB	interleukin 4	16189	-7.82885	-1.97577	0.25237	-3.93338	-1.97577	0	0.00034001
16190_at	Il4ra	CSF2RB	interleukin 4 receptor, alpha	16190	-4.25093	-1.04025	0.244712	-2.05659	-1.04025	2.10479	0.00456897
16600_at	Klf4	KLF4	Kruppel-like factor 4 (gut)	16600	-4.63231	-1.5678	0.338449	-2.96453	-1.5678	1.56844	0.00319897
16641_at	Klrc1	AC068775.1	killer cell lectin-like receptor subfamily C, member 1	16641	-5.31181	-2.31438	0.435704	-4.97391	-2.31438	1.02325	0.00175261
16963_at	Xcl1	XCL1	chemokine (C motif) ligand 1	16963	-9.82661	-2.6759	0.272312	-6.39039	-2.6759	0	0.000147458
170942_at	Erdr1	---	erythroid differentiation regulator 1	170942	-3.93732	-4.58314	1.16403	-23.9697	-4.58314	2.63314	0.00598213
17133_at	Maff	MAFF	v-maf musculoaponeurotic fibrosarcoma oncogene family, protein F (avian)	17133	-9.61048	-2.20709	0.229654	-4.61743	-2.20709	0	0.000163504
17691_at	Sik1	SIK1	salt inducible kinase 1	17691	-4.89406	-1.11477	0.227779	-2.1656	-1.11477	1.56844	0.00254883
17872_at	Ppp1r15a	PPP1R15A	protein phosphatase 1, regulatory (inhibitor) subunit 15A	17872	-6.11154	-1.002	0.163952	-2.00278	-1.002	0.449306	0.00101062
18124_at	Nr4a3	NR4A2	nuclear receptor subfamily 4, group A, member 3	18124	-5.21489	-1.01736	0.195087	-2.02421	-1.01736	1.02325	0.00191805
18227_at	Nr4a2	NR4A2	nuclear receptor subfamily 4, group A, member 2	18227	-5.59196	-1.14437	0.204645	-2.21049	-1.14437	0.521901	0.00139241
18439_at	P2rx7	P2RX7	purinergic receptor P2X, ligand-gated ion channel, 7	18439	-7.04279	-1.14532	0.162623	-2.21195	-1.14532	0	0.000570188
19652_at	Rbm3	HNRNPDL	RNA binding motif (RNP1, RRM) protein 3	19652	-7.12347	-1.4139	0.198484	-2.66456	-1.4139	0	0.000510983
20304_at	Ccl5	CCL5	chemokine (C-C motif) ligand 5	20304	-5.41176	-1.01947	0.188381	-2.02718	-1.01947	0.521901	0.0015916
20527_at	Slc2a3	SLC2A1	solute carrier family 2 (facilitated glucose transporter), member 3	20527	-12.483	-1.18179	0.0946721	-2.26859	-1.18179	0	8.27201e-05
20620_at	Plk2	PLK2	polo like kinase 2	20620	-4.7298	-1.02789	0.217322	-2.03904	-1.02789	1.56844	0.00296381
20708_at	Serpinb6b	HMSD	serine (or cysteine) peptidase inhibitor, clade B, member 6b	20708	-3.24547	-1.16424	0.358728	-2.24115	-1.16424	3.98916	0.0114472
207785_at	Csrnp2	CSRNP2	cysteine-serine-rich nuclear protein 2	207785	-8.51312	-1.05831	0.124315	-2.08249	-1.05831	0	0.000260333
209032_at	Zc3hav1l	ZC3HAV1L	zinc finger CCCH-type, antiviral 1-like	209032	-4.19608	-1.36303	0.324833	-2.57224	-1.36303	2.10479	0.00474935
214854_at	Neurl3	NEURL3	neuralized E3 ubiquitin protein ligase 3	214854	-3.19792	-1.22644	0.383513	-2.3399	-1.22644	3.98916	0.0119081
215418_at	Csrnp1	CSRNP1	cysteine-serine-rich nuclear protein 1	215418	-7.54411	-1.11982	0.148436	-2.1732	-1.11982	0	0.000394788
216274_at	Cep290	CEP290	centrosomal protein 290	216274	8.49708	1.20991	0.142392	2.31324	1.20991	0	0.000265313
216850_at	Kdm6b	KDM6B	KDM1 lysine (K)-specific demethylase 6B	216850	-7.05108	-1.22303	0.173453	-2.33437	-1.22303	0	0.000555248
21803_at	Tgfb1	TGFB1	transforming growth factor, beta 1	21803	-3.82707	-1.12161	0.293073	-2.1759	-1.12161	2.63314	0.00652271
21817_at	Tgm2	TGM2	transglutaminase 2, C polypeptide	21817	4.88908	1.06017	0.216845	2.08518	1.06017	1.50552	0.00257373
21942_at	Tnfrsf9	TNFRSF9	tumor necrosis factor receptor superfamily, member 9	21942	-4.5273	-1.0235	0.226074	-2.03285	-1.0235	1.56844	0.00351657
22032_at	Traf4	TRAF4	TNF receptor associated factor 4	22032	-5.58739	-1.16967	0.209341	-2.2496	-1.16967	0.521901	0.00139739
223775_at	Pim3	PIM1	proviral integration site 3	223775	-7.49538	-1.2995	0.173374	-2.46144	-1.2995	0	0.000409727
226539_at	Dars2	DARS2	aspartyl-tRNA synthetase 2 (mitochondrial)	226539	-3.79748	-1.38008	0.36342	-2.60282	-1.38008	2.63314	0.00674238
228839_at	Tgif2	TGIF1	TGFB-induced factor homeobox 2	228839	-3.57243	-1.43552	0.401832	-2.70479	-1.43552	3.1074	0.00834919
229055_at	Zbtb10	ZBTB10	zinc finger and BTB domain containing 10	229055	-6.70354	-1.28247	0.191312	-2.43255	-1.28247	0	0.000733414
231506_at	Lin54	LIN54	lin-54 homolog (C. elegans)	231506	-4.8205	-1.18836	0.246522	-2.27894	-1.18836	1.56844	0.00269546
23827_at	Bpnt1	BPNT1	bisphosphate 3'-nucleotidase 1	23827	-3.56513	-1.05951	0.297187	-2.08422	-1.05951	3.1074	0.00841283
239217_at	Kctd12	KCTD12	potassium channel tetramerisation domain containing 12	239217	-3.81495	-1.15991	0.304043	-2.23443	-1.15991	2.63314	0.00662342
240064_at	Zfp799	AC008758.6	zinc finger protein 799	240064	7.44755	1.31014	0.175916	2.47966	1.31014	0	0.000446246
24063_at	Spry1	SPRY1	sprouty RTK signaling antagonist 1	24063	-4.68286	-1.12556	0.240358	-2.18186	-1.12556	1.56844	0.00310435
241303_at	Fam78a	FAM78A	family with sequence similarity 78, member A	241303	3.67552	1.20199	0.327025	2.30057	1.20199	3.1074	0.00751812
243910_at	Nfkbid	NFKBID	nuclear factor of kappa light polypeptide gene enhancer in B cells inhibitor, delta	243910	-8.21508	-1.11942	0.136264	-2.17259	-1.11942	0	0.000295192
269941_at	Chsy1	CHSY1	chondroitin sulfate synthase 1	269941	-13.4771	-1.19045	0.0883316	-2.28224	-1.19045	0	7.27605e-05
317757_at	Gimap5	GIMAP1-GIMAP5	GTPase, IMAP family member 5	317757	-2.95624	-1.14713	0.388035	-2.21472	-1.14713	4.56391	0.0153923
319719_at	Simc1	SIMC1	SUMO-interacting motifs containing 1	319719	-5.09919	-1.37385	0.269425	-2.59162	-1.37385	1.02325	0.00212167
320770_at	A630072M18Rik	APTR	RIKEN cDNA A630072M18 gene	320770	-5.5803	-1.71852	0.307961	-3.29097	-1.71852	0.521901	0.00142561
327766_at	Tmem26	SRCAP	transmembrane protein 26	327766	2.98285	1.00011	0.335286	2.00015	1.00011	4.56391	0.0149474
330671_at	B4galnt4	B4GALNT3	beta-1,4-N-acetyl-galactosaminyl transferase 4	330671	7.28844	1.15007	0.157794	2.21925	1.15007	0	0.000471145
384783_at	Irs2	IRS1	insulin receptor substrate 2	384783	-7.40238	-1.49616	0.202119	-2.82091	-1.49616	0	0.000461185
414108_at	9230114K14Rik	---	RIKEN cDNA 9230114K14 gene	414108	-3.80712	-1.21571	0.319327	-2.32256	-1.21571	2.63314	0.00667764
433022_at	Plcxd2	PLCXD2	phosphatidylinositol-specific phospholipase C, X domain containing 2	433022	-4.65603	-1.08044	0.232051	-2.11468	-1.08044	1.56844	0.00317573
56437_at	Rrad	RRAD	Ras-related associated with diabetes	56437	-6.94479	-1.21606	0.175105	-2.32312	-1.21606	0	0.000644331
57259_at	Tob2	TOB2	transducer of ERBB2, 2	57259	-7.10041	-1.02618	0.144524	-2.03662	-1.02618	0	0.000524263
57748_at	Jmy	JMY	junction-mediating and regulatory protein	57748	-5.58686	-1.12045	0.200551	-2.17415	-1.12045	0.521901	0.00140735
58205_at	Pdcd1lg2	PDCD1LG2	programmed cell death 1 ligand 2	58205	-11.3237	-1.56303	0.138032	-2.95474	-1.56303	0	0.000107619
622976_at	Gm6377	---	predicted gene 6377	622976	3.37884	1.0546	0.31212	2.07715	1.0546	3.61437	0.0101392
666339_at	Muc3	MUC12	mucin 3, intestinal	666339	-6.93132	-1.64175	0.23686	-3.12045	-1.64175	0	0.000649311
66971_at	Cdk5rap1	CDK5RAP1	CDK5 regulatory subunit associated protein 1	66971	7.47897	1.51369	0.202393	2.8554	1.51369	0	0.000427986
67020_at	Tmem88	TMEM88	transmembrane protein 88	67020	-7.63473	-1.36127	0.1783	-2.56912	-1.36127	0	0.000379848
67220_at	Plekho1	PLEKHO1	pleckstrin homology domain containing, family O member 1	67220	6.13812	1.00243	0.163312	2.00337	1.00243	0.31956	0.000995684
67480_at	Cwc25	CWC25	CWC25 spliceosome-associated protein	67480	-5.88681	-1.12884	0.191757	-2.18682	-1.12884	0.449306	0.00115504
68151_at	Wls	WLS	wntless WNT ligand secretion mediator	68151	-9.05292	-1.15037	0.127072	-2.21971	-1.15037	0	0.000194489
68939_at	Rasl11b	RASL11B	RAS-like, family 11, member B	68939	-15.1832	-1.21844	0.0802488	-2.32695	-1.21844	0	5.78211e-05
71690_at	Esm1	ESM1	endothelial cell-specific molecule 1	71690	5.38312	1.28135	0.238032	2.43067	1.28135	1.02325	0.00162646
72097_at	2010300C02Rik	KIAA1211L	RIKEN cDNA 2010300C02 gene	72097	-7.06136	-1.25116	0.177185	-2.38033	-1.25116	0	0.000545289
72310_at	Nkg7	NKG7	natural killer cell group 7 sequence	72310	-8.62141	-1.00285	0.116321	-2.00396	-1.00285	0	0.000240414
73847_at	Fam110a	FAM110A	family with sequence similarity 110, member A	73847	-3.35788	-1.05294	0.313572	-2.07475	-1.05294	3.61437	0.010376
74155_at	Errfi1	ERRFI1	ERBB receptor feedback inhibitor 1	74155	-5.25768	-1.10936	0.210999	-2.15751	-1.10936	1.02325	0.00184336
75869_at	Arl5b	ARL5A	ADP-ribosylation factor-like 5B	75869	-10.264	-1.56263	0.152243	-2.95393	-1.56263	0	0.000127538
83924_at	Gpr137b	GPR137B	G protein-coupled receptor 137B	83924	4.28271	1.22336	0.285651	2.3349	1.22336	2.10479	0.00440353
